# Supplementary material for: Mining of haplotype-based expressed sequence tag single nucleotide polymorphisms in citrus
Source: PubMed Central journal article supplement (PMC3827885; doi:10.1186/1471-2164-14-746), 2013-11-01
Supplement: 1471-2164-14-746-S3.pdf [file 1471-2164-14-746-S3.pdf]

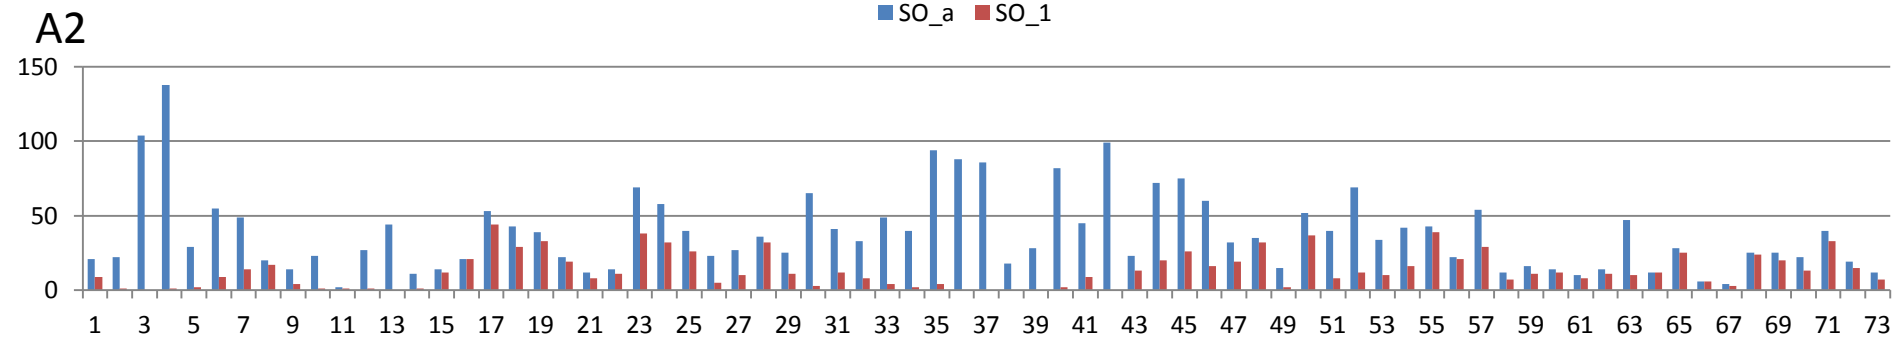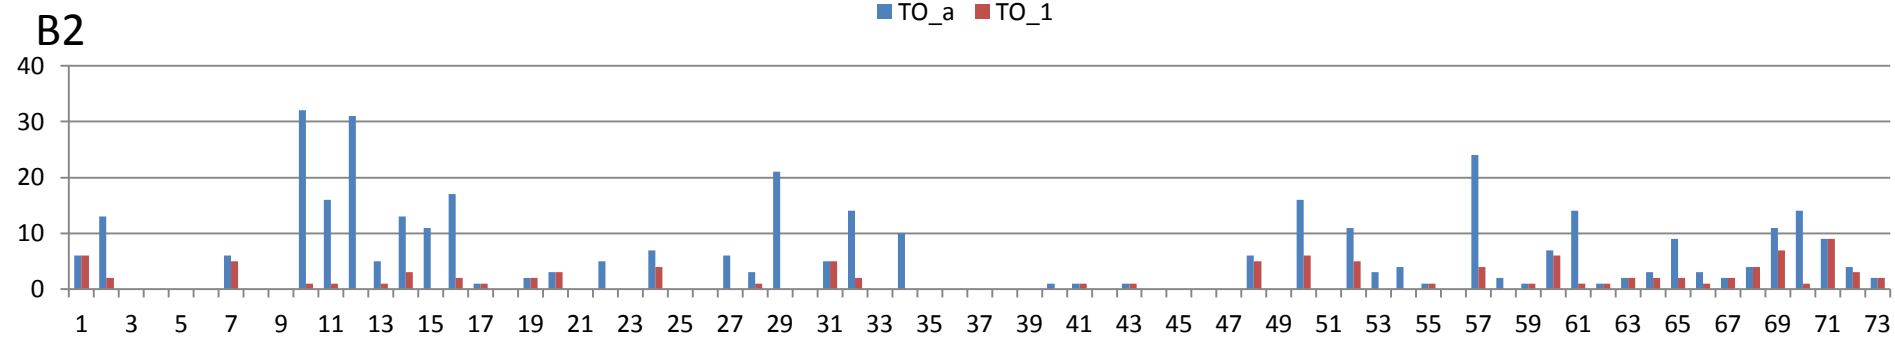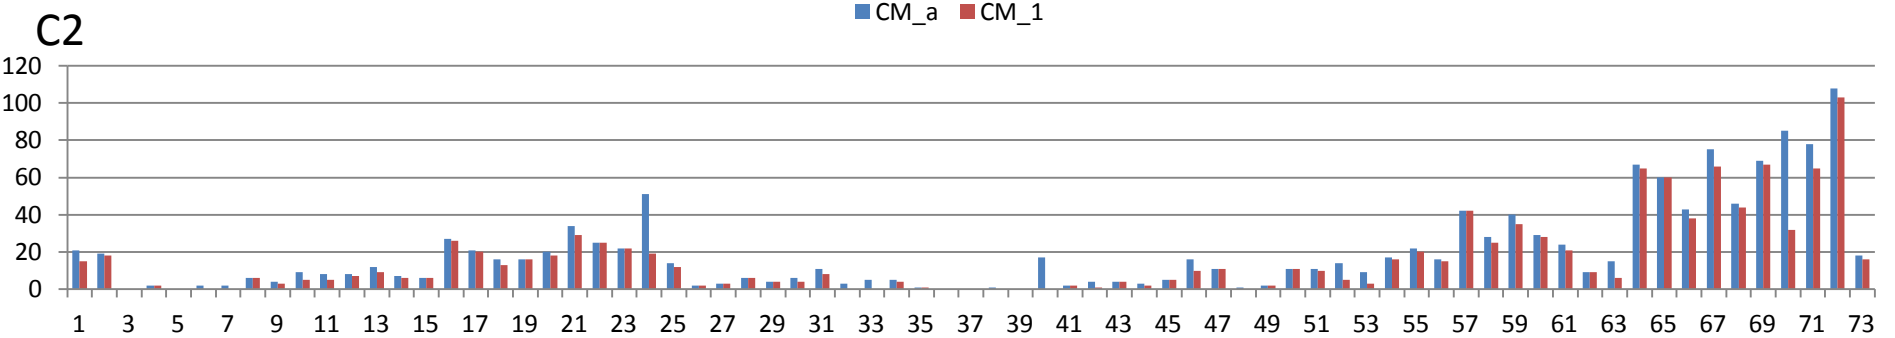

Additional File 3 Figure S1. SNP distribution on the Clementine reference genome Scaffold\_2. Each interval of the x-axis represented 500kb of the scaffold, and the y-axis represented the number of SNPs in each 500kb on the scaffold. SO – sweet orange (**A2**); TO – trifoliate orange (**B2**); CM – Clementine mandarin (**C2**); “\_a” – counts of all alignments generated by all SNPs; “\_1” – counts of SNPs of only 1 unique hit/alignment in the genome. Differences between the “\_a” and “\_1” numbers were observed in several regions of each cultivar.

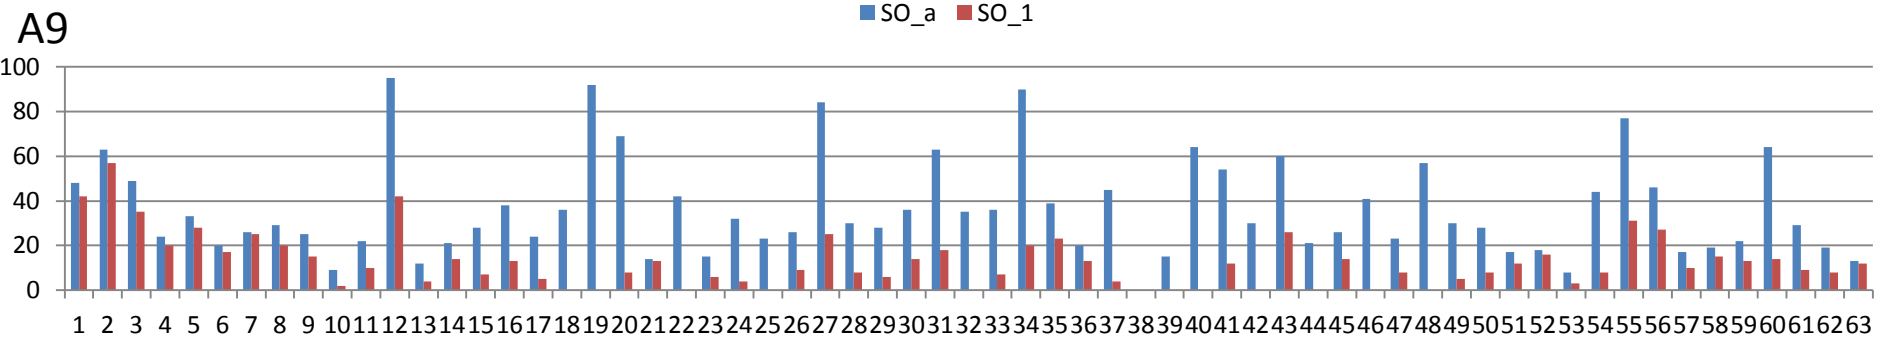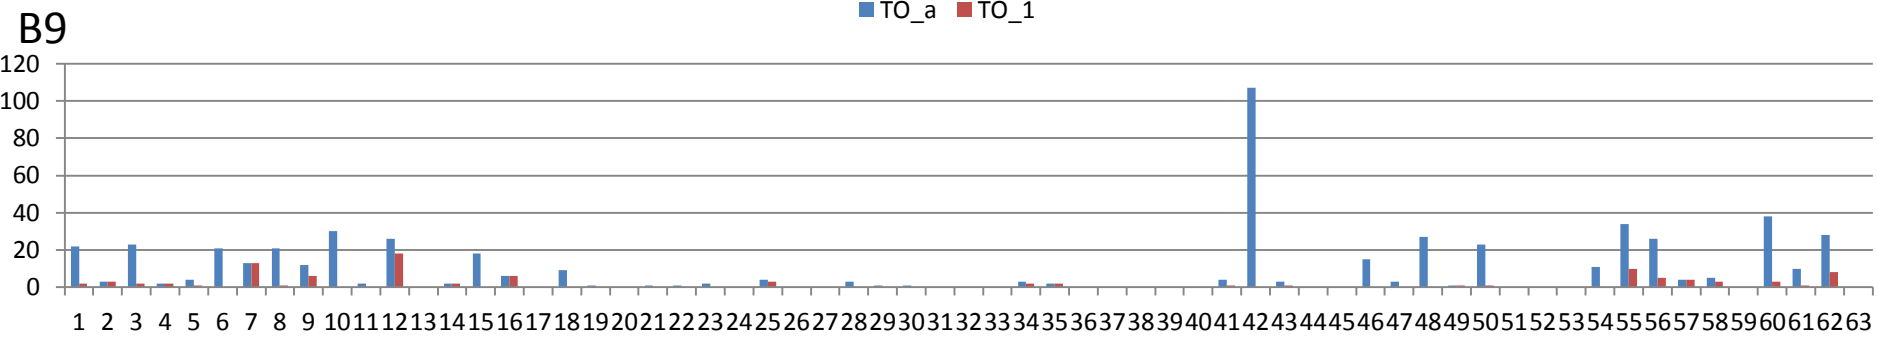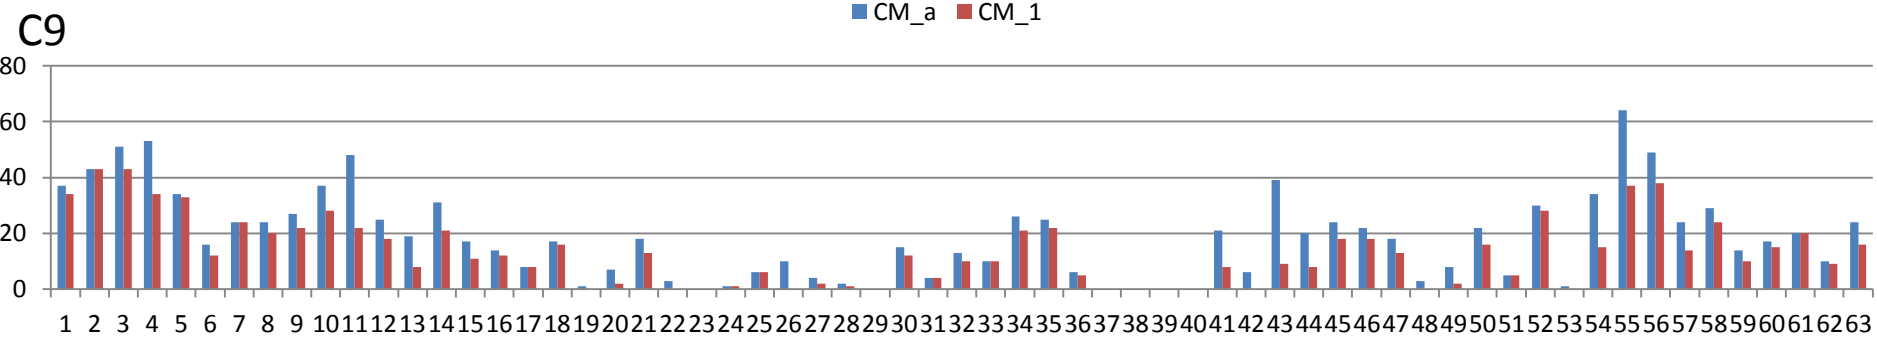

Additional File 3 Figure S1. SNP distribution on the Clementine reference genome Scaffold\_9. Each interval of the x-axis represented 500kb of the scaffold, and the y-axis represented the number of SNPs in each 500kb on the scaffold. SO – sweet orange (**A9**); TO – trifoliate orange (**B9**); CM – Clementine mandarin (**C9**); “\_a” – counts of all alignments generated by all SNPs; “\_1” – counts of SNPs of only 1 unique hit/alignment in the genome. Differences between the “\_a” and “\_1” numbers were observed in several regions of each cultivar.
